# Supplementary material for: Integrated Multi-Omics Reveal PDK4-Mediated Mitochondrial Dysfunction in Renal Ischemia-Reperfusion Injury
Source: Research Square preprint supplement (doi:10.21203/rs.3.rs-6927061/v1), 2025-07-09

# Full uncropped gels in Figure 4

Repeat 1-2

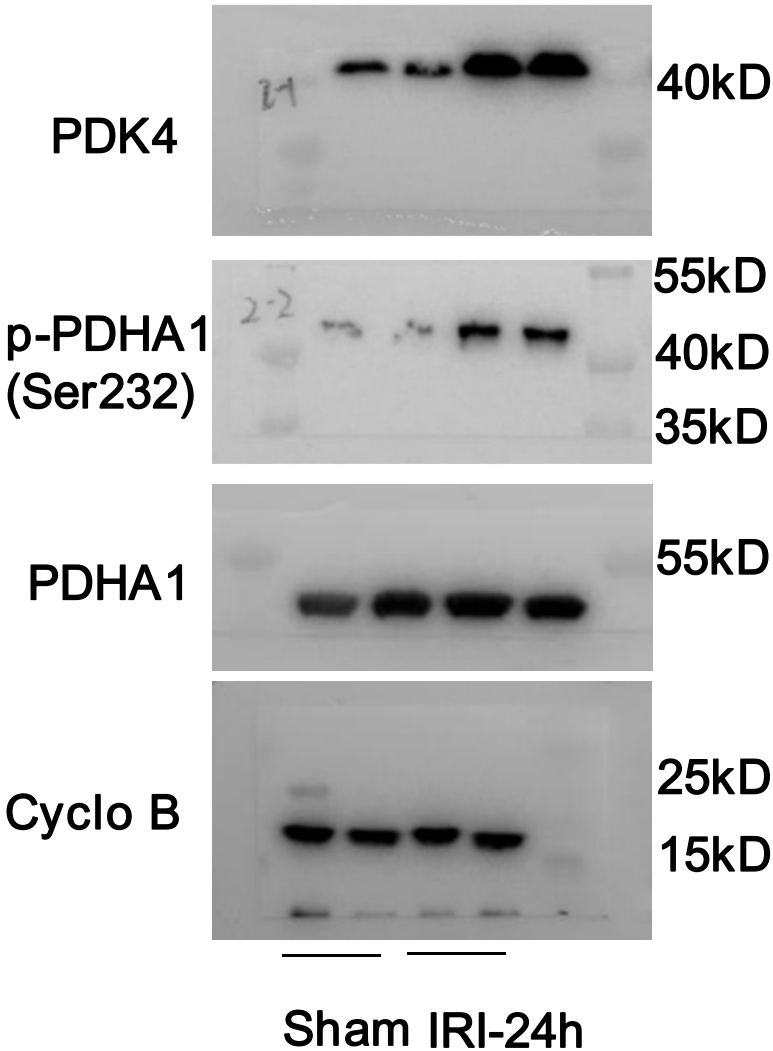

Repeat 3-4

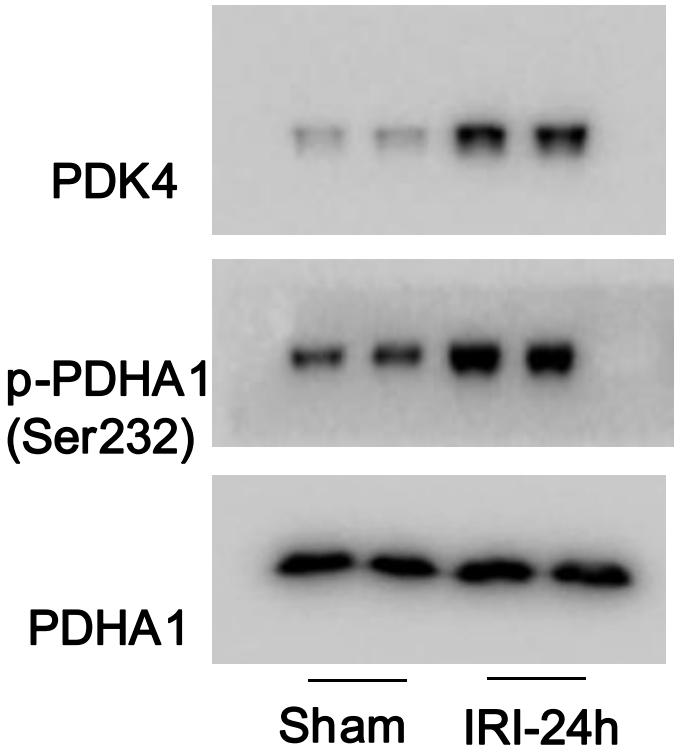

Repeat 5-6

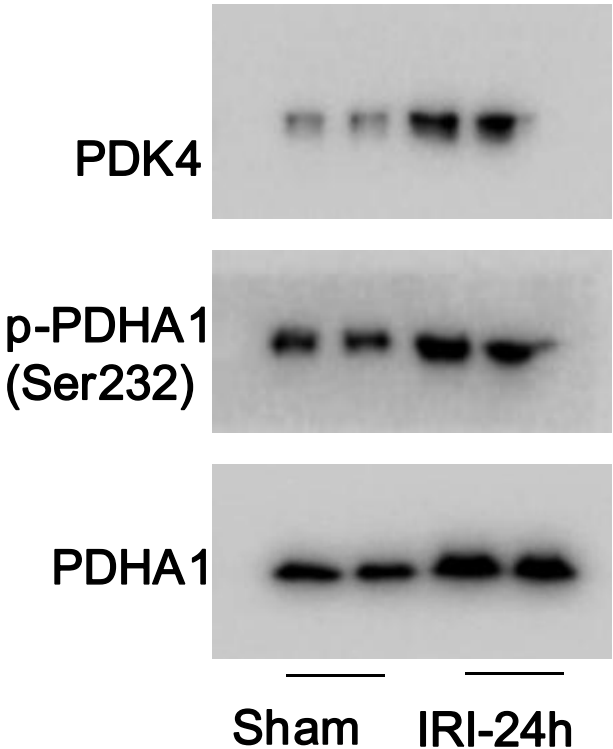

Full uncropped gels in Figure 5

Repeat 1-2

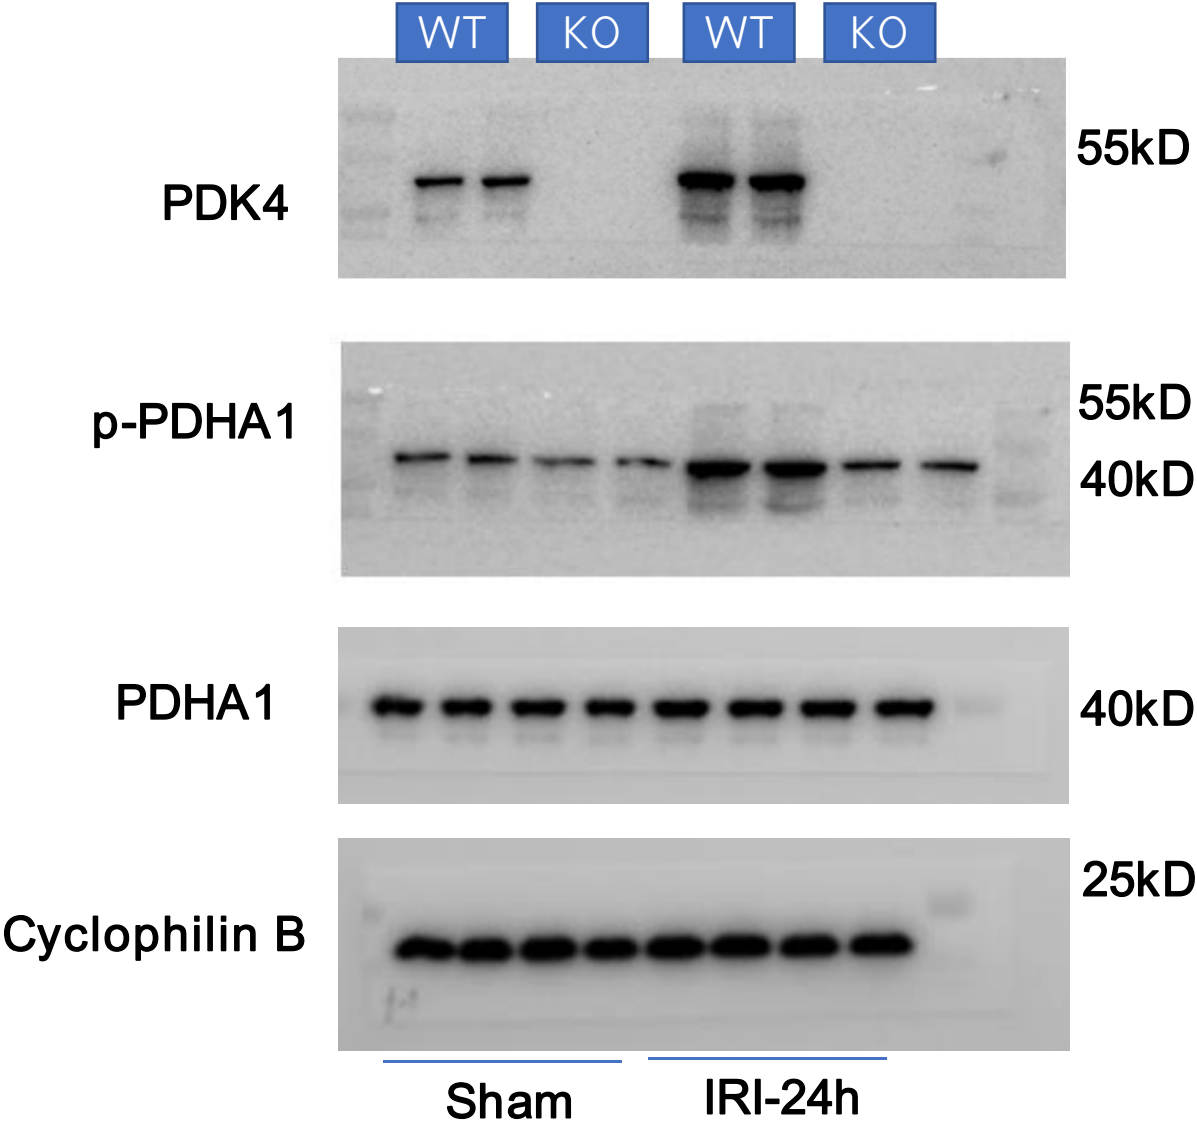

# Full uncropped gels in Figure 5

Repeat 3

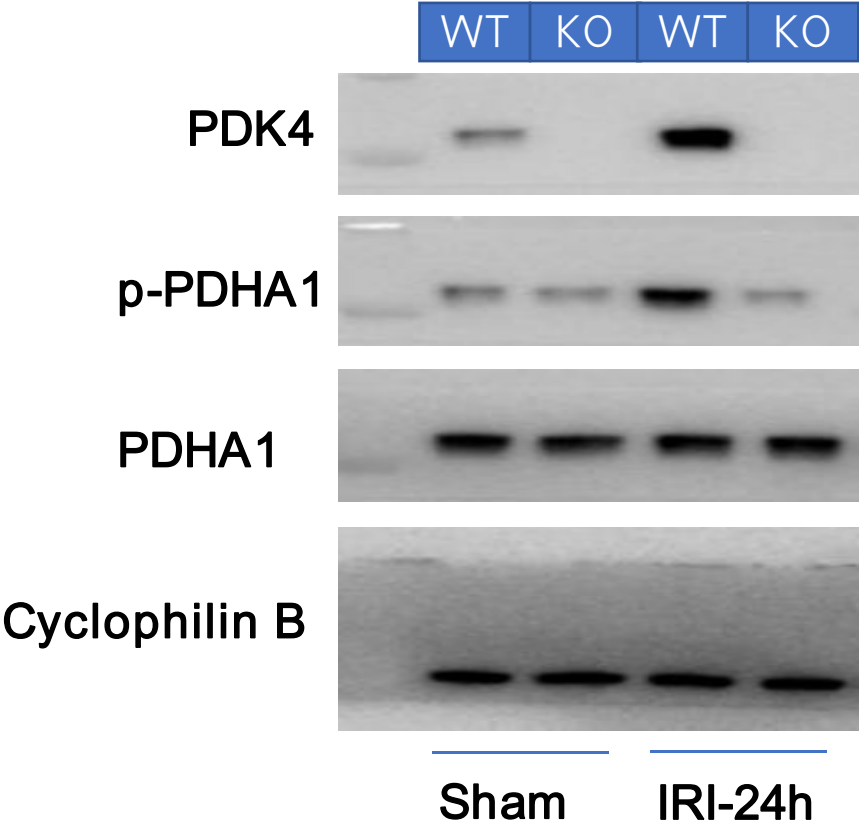

Repeat 4-5

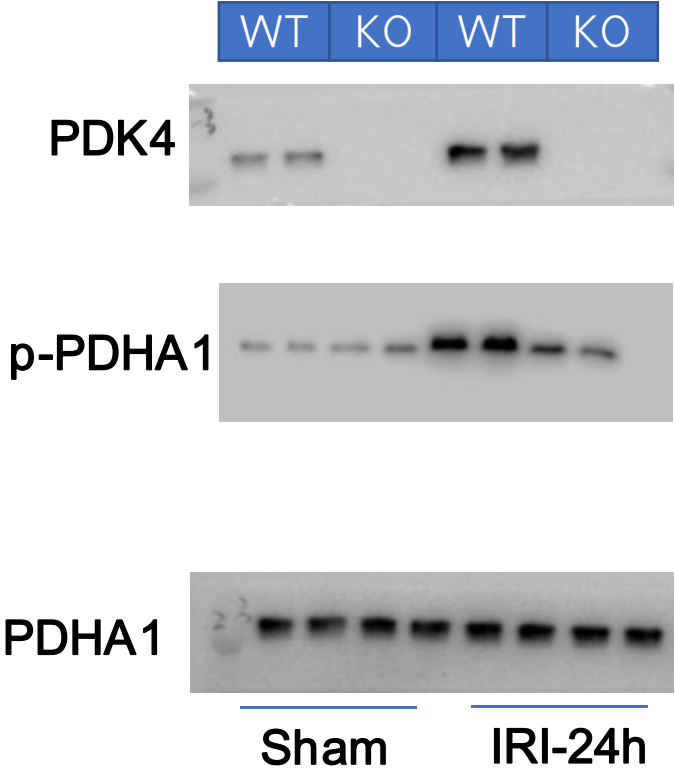

# Full uncropped gels in Figure 6

Repeat 1-3

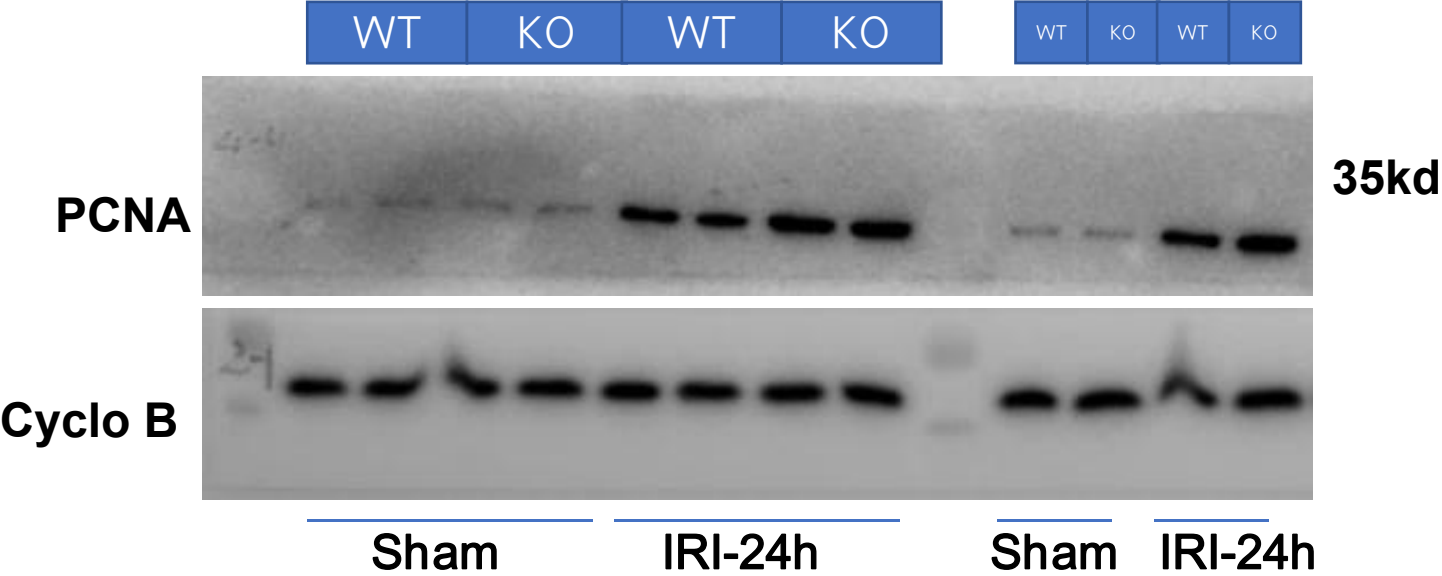

Repeat 4

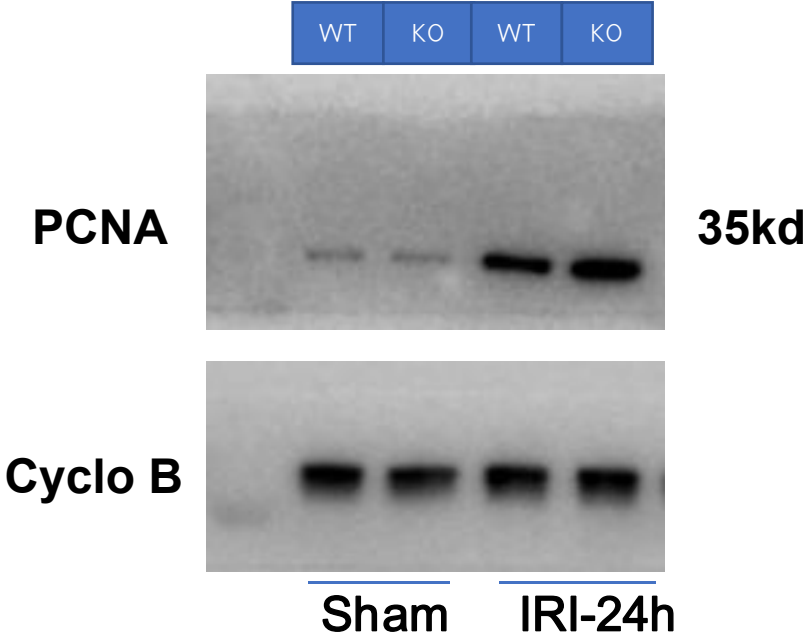

## Full uncropped gels in Figure 7C

Repeat 1-4

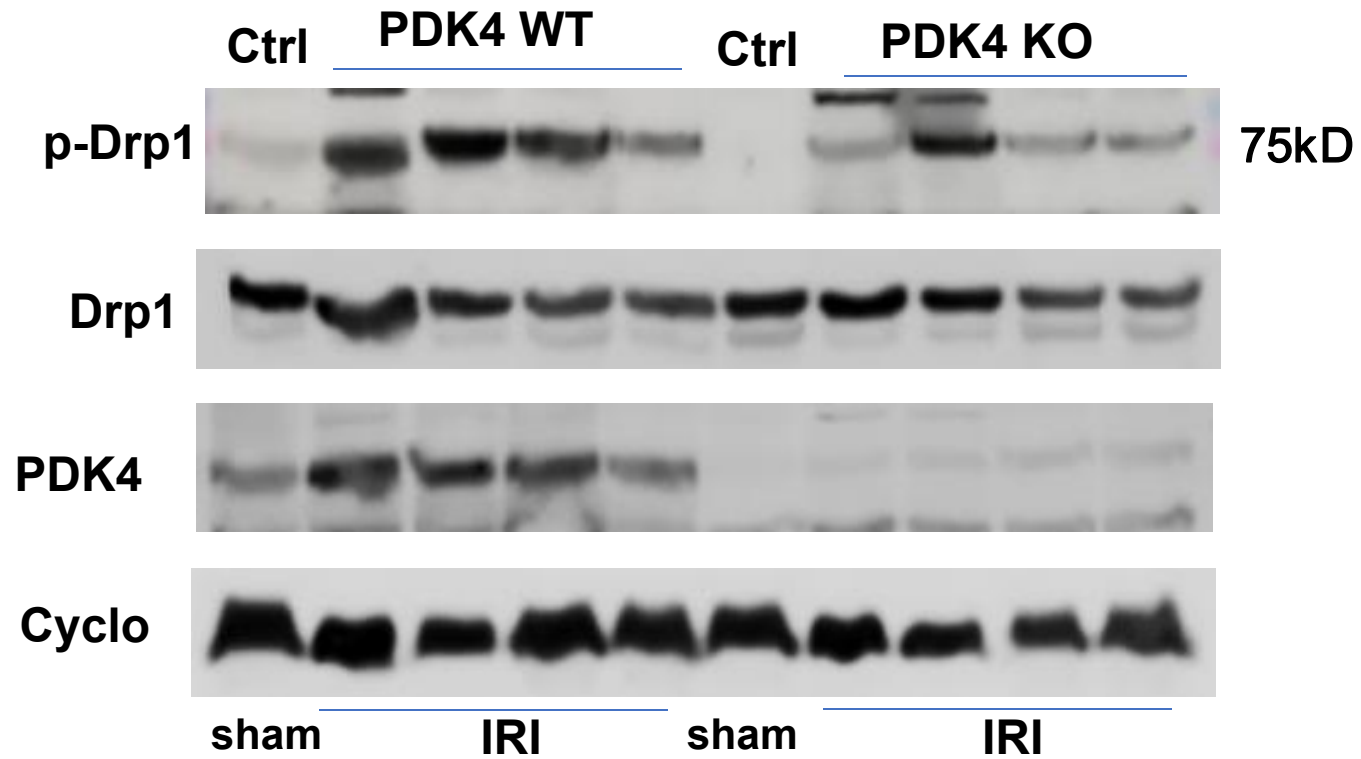

# Full uncropped gels in Figure 7E

Repeat 1-2

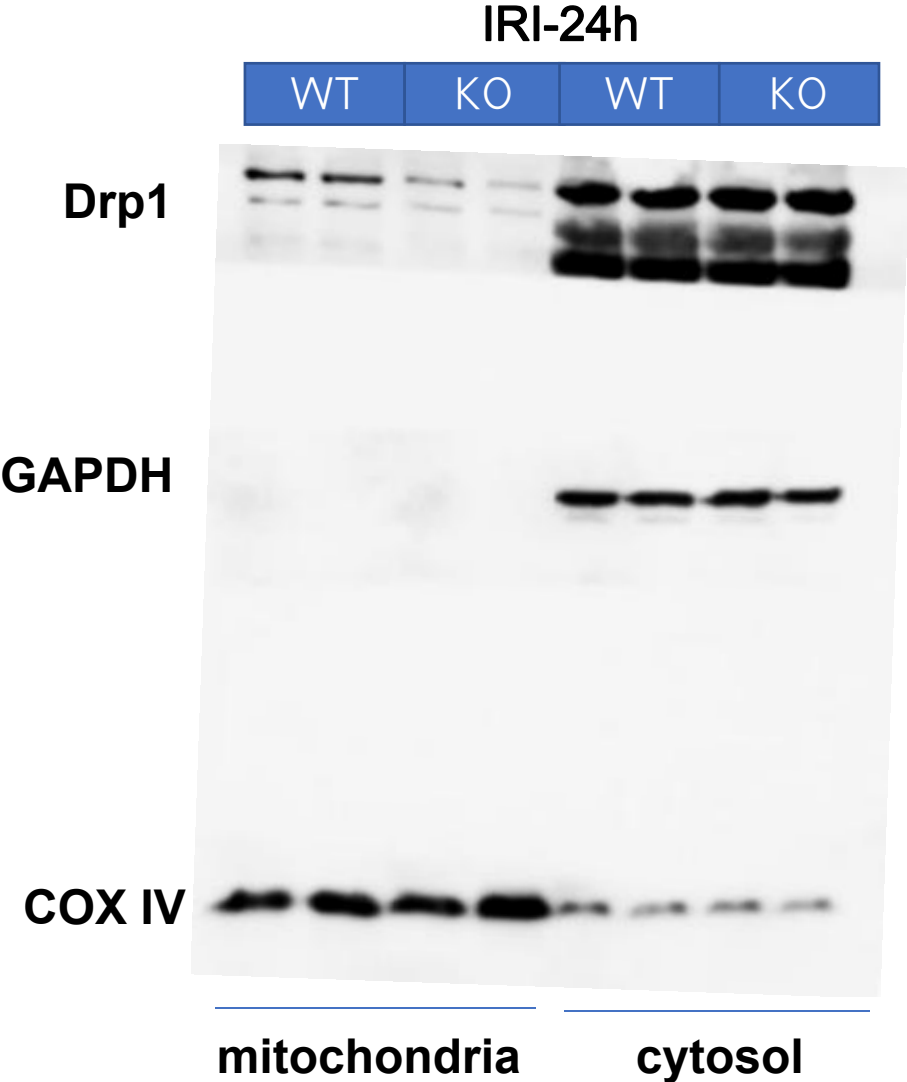

# Full uncropped gels in Supplementary Figure 7

Repeat 1-2

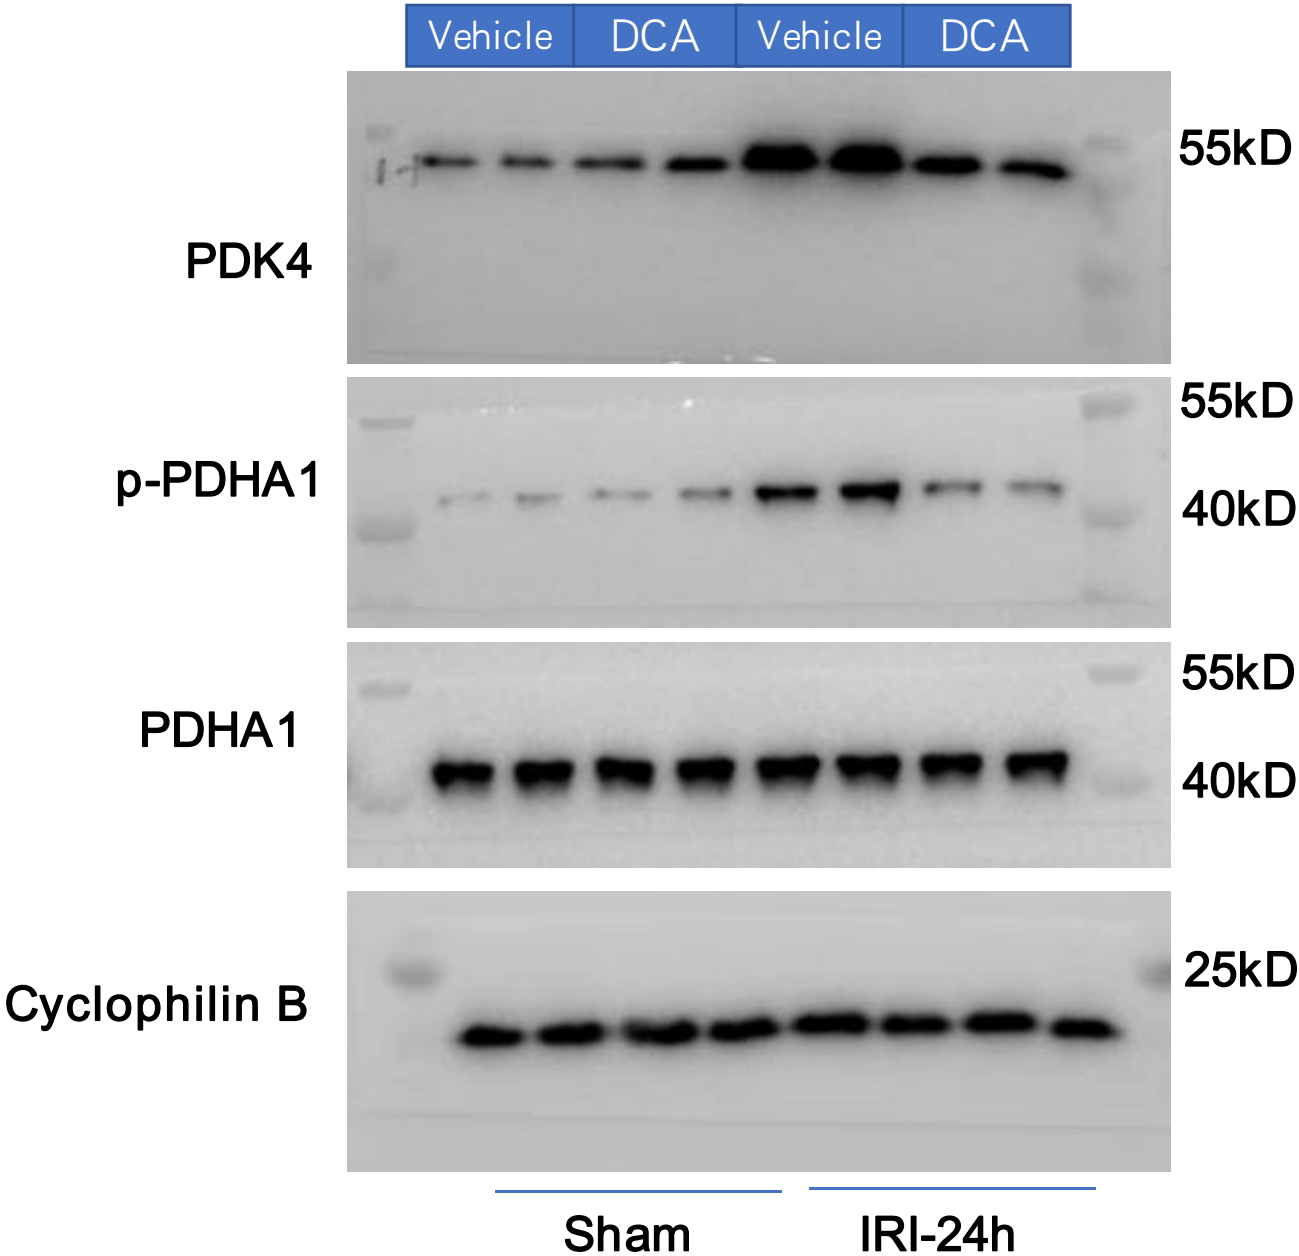

# Full uncropped gels in Supplementary Figure 7

Repeat 3-4

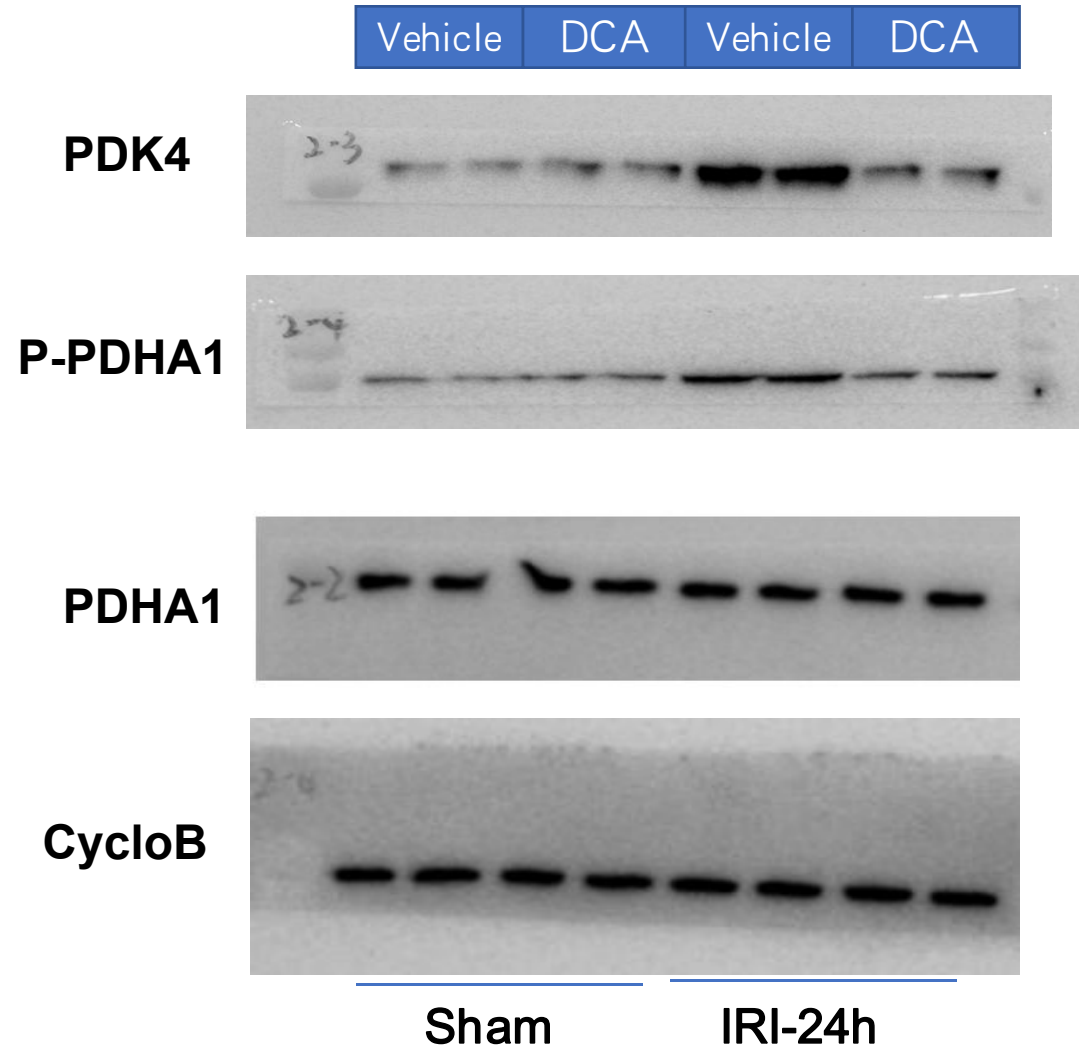

Supplement: Supplementary file 1 [file b5e39f5f051ed3f1aa95da3d.pdf]
